# Supplementary material
Source: publisher figshare collection journal article supplement (https://rs.figshare.com/ndownloader/files/18107351)
Supplement: Supplementary file 1 [file 18107351]

'This script was used to merge and combine data from Nadavs R03'


library(tidyverse)
library(psych)
library(tidyr)
library(dplyr)
library(reshape2)
library(magrittr)
'read data'

data1=read.csv("Demographics.csv")
data2=read.csv("For Dan R03Data SGA.csv")

data <- merge(data1,data2,by="Study.ID")   

write.csv(data,"For Dan Filtered Data SGA Final")
